# Supplementary material for: Challenges of diagnosis of COVID-19 in trauma patients: A case series
Source: PubMed Central journal article supplement (PMC7435208; doi:10.1177/1460408620950602), 2021-07
Supplement: sj-pdf-1-tra-10.1177_1460408620950602.pdf [file sj-pdf-1-tra-10.1177_1460408620950602.pdf]

## Appendix:

**Table 1. detailed lab data of COVID-19 patients in their hospital course**

| Lab data                                                          | Case 1          | Case 2         | Case 3          | Case 4          | Case 5          | Case 6          | Case 7          | Case 8        |
|-------------------------------------------------------------------|-----------------|----------------|-----------------|-----------------|-----------------|-----------------|-----------------|---------------|
| <b>Blood cell counts on day 1 of admission</b>                    |                 |                |                 |                 |                 |                 |                 |               |
| <b>Total WBC<sup>1</sup> count (×10<sup>9</sup> cells/L)</b>      | 15.7            | 4              | 17.1            | 18.6            | 19              | 29.3            | 16              | 21            |
| Absolute Neutrophil counts (×10 <sup>9</sup> cells/L, fraction %) | 13.7<br>(87.8%) | 3.5<br>(87.8%) | 13.8<br>(80.9%) | 15.6<br>(84%)   | 16.3<br>(86%)   | 25.2<br>(86%)   | 8.3<br>(52%)    | 16.2<br>(77%) |
| <b>Absolute Lymphocyte count (cells/ml, fraction%)</b>            | 847<br>(5.4%)   | 228<br>(5.7%)  | 1760<br>(10.3%) | 17100<br>(9.2%) | 1254<br>(6.6%)  | 1172<br>(4%)    | 6720<br>(42%)   | 2520<br>(12%) |
| <b>Platelet count (×10<sup>9</sup> cells/L)</b>                   | 150             | 100            | 191             | 219             | 287             | 159             | 271             | 257           |
| <b>Blood cell counts during hospital course</b>                   |                 |                |                 |                 |                 |                 |                 |               |
| <b>total WBC count (×10<sup>9</sup> cells/L)</b>                  | 5.9             | 2.7            | 26.9            | 17.3            | 24.3            | 18.5            | 8.8             | N/A           |
| Absolute Neutrophil counts (×10 <sup>9</sup> cells/L, fraction %) | 4.6<br>(78.8%)  | 1.9<br>(70%)   | 2.5<br>(91.7%)  | 14.3<br>(82.5%) | 20.2<br>(83%)   | 14.4<br>(78%)   | 7.4<br>(84%)    | N/A           |
| <b>Absolute Lymphocyte count (cells/ml, fraction %)</b>           | 991<br>(16.8%)  | 297<br>(11%)   | 2232<br>(8.3%)  | 2076<br>(12%)   | 2138<br>(8.8%)  | 2645<br>(14.3%) | 1434<br>(16.3%) | N/A           |
| <b>Platelet count (×10<sup>9</sup> cells/L)</b>                   | 110             | 70             | 303             | 163             | 1200            | 160             | 158             | N/A           |
| <b>Blood cell counts at the time of death/ discharge</b>          |                 |                |                 |                 |                 |                 |                 |               |
| <b>total WBC count (×10<sup>9</sup> cells/L)</b>                  | 9.8             | 3.2            | 13.8            | 10.4            | 17.6            | 12.1            | 6.9             | N/A           |
| Absolute Neutrophil counts (×10 <sup>9</sup> cells/L, fraction %) | 8.2<br>(83.9%)  | 2.6<br>(80%)   | 11.3<br>(82.1%) | 8.8<br>(84.9%)  | 14.1<br>(80%)   | 8.6<br>(71%)    | 4.1<br>(58.9%)  | N/A           |
| <b>Absolute Lymphocyte count (cells/ml, fraction %)</b>           | 1185<br>(12.1%) | 192 (6%)       | 2083<br>(15.1%) | 884<br>(8.5%)   | 1988<br>(11.3%) | 1923<br>(15.9%) | 2166<br>(31.4%) | N/A           |
| <b>Platelet count (×10<sup>9</sup> cells/L)</b>                   | 24              | 50             | 120             | 200             | 537             | 150             | 204             | N/A           |
| <b>Procalcitonin</b>                                              | N/A             | N/A            | N/A             | 1.39            | N/A             | 1.69            | N/A             | 014           |
| <b>CRP<sup>2</sup> levels (mg/L)</b>                              |                 |                |                 |                 |                 |                 |                 |               |
| <b>On day 1 of admission</b>                                      | 150             | 74             | 89              | 8               | N/A             | 92              | N/A             | 60            |
| <b>In the hospital course</b>                                     | 110             | 80             | 81              | 56              | N/A             | 55              | 79              | N/A           |

|                                            |      |      |      |      |      |      |     |      |
|--------------------------------------------|------|------|------|------|------|------|-----|------|
| <b>At the time of death/<br/>discharge</b> | 24   | N/A  | 25   | N/A  | N/A  | N/A  | N/A | N/A  |
| <b>ESR<sup>3</sup> levels (mm/hour)</b>    |      |      |      |      |      |      |     |      |
| <b>On day 1 of admission</b>               | N/A  | 25   | 34   | 50   | N/A  | 32   | N/A | 35   |
| <b>In the hospital course</b>              | 42   | 25   | 77   | 83   | NA   | 68   | 39  | N/A  |
| <b>At the time of death/<br/>discharge</b> | 38   | N/A  | 14   | N/A  | N/A  | N/A  | N/A | N/A  |
| <b>BUN<sup>4</sup> levels mg/dL:</b>       |      |      |      |      |      |      |     |      |
| <b>On day 1 of admission</b>               | 22   | 25   | 14   | 8    | 14   | 23   | 7   | 14   |
| <b>In the hospital course</b>              | 100  | 40   | 20   | 56   | 34   | 20   | 7   | N/A  |
| <b>At the time of death/<br/>discharge</b> | 101  | 100  | 19   | 41   | 21   | 15   | 6   | N/A  |
| <b>Creatinine levels (mg/dL)</b>           |      |      |      |      |      |      |     |      |
| <b>On day 1 of admission</b>               | 1.15 | 1.5  | 0.99 | 1.01 | 1.09 | 0.99 | 0.4 | 1.3  |
| <b>In the hospital course</b>              | 3.9  | 1.7  | 1.2  | 1.84 | 1.24 | 1.17 | 0.8 | N/A  |
| <b>At the time of death/<br/>discharge</b> | 4.1  | 4    | 1.5  | 1.1  | 1.07 | 0.74 | 0.6 | N/A  |
| <b>LDH<sup>5</sup></b>                     | 1009 | 800  | 977  | 550  | 600  | 780  | 884 | 450  |
| <b>SGOT<sup>6</sup> level (U/L)</b>        |      |      |      |      |      |      |     |      |
| <b>On day 1 of admission</b>               | 70   | 80   | 66   | 73   | 34   | N/A  | 48  | 23   |
| <b>In the hospital course</b>              | 18   | N/A  | 22   | 72   | 121  | 216  | N/A | N/A  |
| <b>At the time of death/<br/>discharge</b> | N/A  | N/A  | 17   | 126  | N/A  | 79   | N/A | N/A  |
| <b>SGPT<sup>7</sup> levels (U/L)</b>       |      |      |      |      |      |      |     |      |
| <b>On day 1 of admission</b>               | 46   | 68   | 55   | 12   | 24   | 108  | 27  | 31   |
| <b>In the hospital course</b>              | 3    | N/A  | 15   | 77   | 120  | 83   | N/A | N/A  |
| <b>At the time of death/<br/>discharge</b> | N/A  | N/A  | 17   | 168  | N/A  | N/A  | N/A | N/A  |
| <b>D-Dimer</b>                             | 1500 | 1100 | 850  | 3162 | 1500 | 2747 | N/A | 1718 |
| <b>Troponin</b>                            | N/A  | N/A  | 78   | 449  | <1.5 | N/A  | N/A | N/A  |

**On day 1 of admission**

|                                         |     |       |     |       |      |     |       |       |
|-----------------------------------------|-----|-------|-----|-------|------|-----|-------|-------|
| <b>PaO<sub>2</sub><sup>8</sup> mmHg</b> | 209 | 55    | 42  | 30    | 25.9 | 140 | 39.9  | 49.9  |
| <b>SaO<sub>2</sub><sup>9</sup> %</b>    | 93% | 87.9% | 78% | 56.4% | 47%  | 98% | 69.3% | 82.4% |

**In the hospital course**

|                              |     |     |     |       |      |     |       |     |
|------------------------------|-----|-----|-----|-------|------|-----|-------|-----|
| <b>PaO<sub>2</sub>, mmHg</b> | 58  | 45  | 78  | 62    | 46.7 | 35  | 36.5  | N/A |
| <b>SaO<sub>2</sub>, %</b>    | 91% | 70% | 74% | 91.8% | 69%  | 64% | 88.7% | N/A |

**At the time of death/ discharge**

|                              |     |     |       |       |       |     |       |     |
|------------------------------|-----|-----|-------|-------|-------|-----|-------|-----|
| <b>PaO<sub>2</sub>, mmHg</b> | 164 | 60  | N/A   | 125   | 68.5  | 139 | 153   | N/A |
| <b>SaO<sub>2</sub>. %</b>    | 98% | 67% | 56.2% | 98.7% | 94.9% | 99% | 19.2% | N/A |

<sup>1</sup>WBC: White Blood Cells, <sup>2</sup>CRP: C-Reactive Protein, <sup>3</sup>ESR: Erythrocyte Sedimentation Rate, <sup>4</sup>LDH: Lactate Dehydrogenase, <sup>5</sup>BUN: Blood Urea Nitrogen, <sup>6</sup>SGOT: Serum Glutamic-Oxaloacetic Transaminase, <sup>7</sup>SGPT: Serum Glutamic-Pyruvic Transaminase, <sup>8</sup>PaO<sub>2</sub>: partial pressure of oxygen, <sup>9</sup>SaO<sub>2</sub>: Oxygen saturation.

**Table 2. detailed lab data of non- COVID-19 cases in their hospital course:**

| Lab data                                                          | Case A       | Case B       | Case C      |
|-------------------------------------------------------------------|--------------|--------------|-------------|
| <b>Blood cell counts on day 1 of admission</b>                    |              |              |             |
| <b>Total WBC<sup>1</sup> count (×10<sup>9</sup> cells/L)</b>      | 19.3         | 7            | 9.7         |
| Absolute Neutrophil counts (×10 <sup>9</sup> cells/L, fraction %) | 17.2 (89.2%) | 3.4 (49%)    | 7.7 (79%)   |
| <b>Absolute Lymphocyte count (cells/ml, fraction%)</b>            | 1582 (8.2%)  | 2653 (37.9%) | 1067 (11%)  |
| <b>Platelet count (×10<sup>9</sup> cells/L)</b>                   | 217          | 183          | 160         |
| <b>Blood cell counts in the course of hospital</b>                |              |              |             |
| <b>Total WBC count (×10<sup>9</sup> cells/L)</b>                  | 21.8         | 22           | 13.5        |
| Absolute Neutrophil counts (×10 <sup>9</sup> cells/L, fraction %) | 19 (87.5%)   | 19.1 (87%)   | 1.1 (84.1%) |
| <b>Absolute Lymphocyte count (cells/ml, fraction%)</b>            | 1329 (6.1%)  | 1056 (4.8%)  | 1242 (9.2%) |
| <b>Platelet count (×10<sup>9</sup> cells/L)</b>                   | 272          | 238          | 222         |

| <b>Blood cell counts at the time of death/ discharge</b>        |              |             |              |
|-----------------------------------------------------------------|--------------|-------------|--------------|
| <b>Total WBC count (<math>\times 10^9</math> cells/L)</b>       | 6.2          | 12.8        | 12.9         |
| Absolute Neutrophil counts ( $\times 10^9$ cells/L, fraction %) | 3.9 (64.3%)  | 10.5 (82%)  | 9.8 (76.6%)  |
| <b>Absolute Lymphocyte count (cells/ml, fraction%)</b>          | 1240 (20.9%) | 1075 (8.4%) | 1496 (11.6%) |
| <b>Platelet count (<math>\times 10^9</math> cells/L)</b>        | 268          | 369         | 317          |
| <b>Procalcitonin</b>                                            | 0.78         | 0.5         | 4.29         |
| <b>CRP<sup>2</sup> levels (mg/L)</b>                            |              |             |              |
| <b>On day 1 of admission</b>                                    | N/A          | N/A         | 48           |
| <b>In the hospital course</b>                                   | 80           | 99          | N/A          |
| <b>At the time of death/ discharge</b>                          | N/A          | 66          | N/A          |
| <b>ESR<sup>3</sup> levels (mm/hour)</b>                         |              |             |              |
| <b>On day 1 of admission</b>                                    | N/A          | N/A         | 70           |
| <b>In the hospital course</b>                                   | 81           | 29          | N/A          |
| <b>At the time of death/ discharge</b>                          | N/A          | 81          | N/A          |
| <b>BUN<sup>4</sup> levels mg/dL</b>                             |              |             |              |
| <b>On day 1 of admission</b>                                    | 9            | 16          | 25           |
| <b>In the hospital course</b>                                   | 11           | 12          | 31           |
| <b>At the time of death/ discharge</b>                          | 12           | 14          | 15           |
| <b>Creatinine levels (mg/dL)</b>                                |              |             |              |
| <b>On day 1 of admission</b>                                    | 1.1          | 0.8         | 0.8          |
| <b>In the hospital course</b>                                   | 1.2          | 0.7         | 0.9          |
| <b>At the time of death/ discharge</b>                          | 0.7          | 0.8         | 0.5          |
| <b>LDH<sup>5</sup></b>                                          | N/A          | N/A         | 1433         |
| <b>SGOT level (U/L)</b>                                         |              |             |              |
| <b>On day 1 of admission</b>                                    | 75           | 44          | 234          |
| <b>In the hospital course</b>                                   | 77           | 81          | 59           |
| <b>At the time of death/ discharge</b>                          | N/A          | N/A         | N/A          |
| <b>SGPT<sup>6</sup> level (U/L)</b>                             |              |             |              |
| <b>On day 1 of admission</b>                                    | 21           | 27          | 175          |

|                                        |       |       |      |
|----------------------------------------|-------|-------|------|
| <b>In the hospital course</b>          | 42    | 56    | 83   |
| <b>At the time of death/ discharge</b> | N/A   | N/A   | N/A  |
| <b>D-Dimer</b>                         | 4077  | 3062  | N/A  |
| <b>Troponin</b>                        | N/A   | 1035  | N/A  |
| <b>On day 1 of admission</b>           |       |       |      |
| <b>PaO<sub>2</sub><sup>7</sup></b>     | 41.5  | 105   | 55.2 |
| <b>SaO<sub>2</sub><sup>8</sup></b>     | 74.2% | 97.4% | 88%  |
| <b>In the hospital course</b>          |       |       |      |
| <b>PaO<sub>2</sub></b>                 | 41.5  | 65    | N/A  |
| <b>SaO<sub>2</sub></b>                 | 74.2% | 71.3% | N/A  |
| <b>At the time of death/ discharge</b> |       |       |      |
| <b>PaO<sub>2</sub></b>                 | 168.7 | 136   | 140  |
| <b>SaO<sub>2</sub></b>                 | 99.2% | 99%   | N/A  |

<sup>1</sup>WBC: White Blood Cells, <sup>2</sup>CRP: C-Reactive Protein, <sup>3</sup>ESR: Erythrocyte Sedimentation Rate, <sup>4</sup>LDH: Lactate Dehydrogenase, <sup>5</sup>BUN: Blood Urea Nitrogen, <sup>6</sup>SGOT: Serum Glutamic-Oxaloacetic Transaminase, <sup>7</sup>SGPT: Serum Glutamic-Pyruvic Transaminase, <sup>8</sup>PaO<sub>2</sub>: partial pressure of oxygen, <sup>9</sup>SaO<sub>2</sub>: Oxygen saturation.
